# Supplementary material
Source: publisher figshare collection journal article supplement (https://tandf.figshare.com/ndownloader/files/18197876)
Supplement: Supplementary file 1 [file 18197876]

**Supplementary Material**: **Optimal Job Scheduling and Inspection of a Machine with Delayed Failure**

**Equation S1.** The recursive formula for minimal repair and replacement of the single machine at failure and inspection time considering *i* jobs in a sequence

S2. Detailed Heuristic algorithm

The main scheme of heuristic algorithm adopted from (S. Wang and Liu 2013) is introduced in below: the idea is ﬁrst to construct a schedule according to Shortest Processing Time algorithm and then to make it feasible for the problem. The algorithm goes through iterations. In iteration of the algorithm, jobs are taken into consideration.

Step 1: Use the rule to generate a job sequence.

Step 2: For to length of (jobs) do;

Step 3: determine the inspection policy before each job, , , use the following rule; represents the age of the machine after processing job in the sequence and shows the expected number of failures during processing of job ; where

Step 4*:* If counter, go to step 5; otherwise, set and go to Step 3.

Step 5: The resulting objective value is used as the expected makespan of the jobs.

Clearly, the minimum expected required time for processing each job is obtained when the machine is brand new. In the similar way the expected number of failures during processing of the jobs would be affected by the machine’s age. As the machine ages, the expected number of failures would be higher. We use this property in developing the heuristic algorithm.

S3. MATLAB code for expected makespan of one job

Data = xlsread('C:\data\Jobs processing times.xls');

% function expected makespan when there is only one job

function Expected Values=Expected_One_Job (t0,p,beta1,eta1,beta2,eta2,df)

[F=@(x)(beta1/eta1).*((x+t0)/eta1).^(beta1-1).*exp(-1.*(((x+t0)/eta1).^beta1-(t0/eta1).^beta1)).*(1-exp(-1.*(((p+t0)/eta2).^beta2-((x+t0)/eta2).^beta2)))](mailto:F=@(x)(beta1/eta1).*((x+t0)/eta1).%5e(beta1-1).*exp(-1.*(((x+t0)/eta1).%5ebeta1-(t0/eta1).%5ebeta1)).*(1-exp(-1.*(((p+t0)/eta2).%5ebeta2-((x+t0)/eta2).%5ebeta2)))); % Expected defect arrival time

Probability_failure_less_than_p = integral(F,0,p);

F = @(x,y)(x+y).*(beta1/eta1).*((x+t0)/eta1).^(beta1-1).*exp(-1.*(((x+t0)/eta1).^beta1-(t0/eta1).^beta1)).*(beta2/eta2).*((x+y+t0)./eta2).^(beta2-1).*exp(-1*(((y+x+t0)./eta2).^beta2-((x+t0)/eta2).^beta2)); % Expected failure arrival time

Probability _failure_less_than_p = integral2(F,0,p,0,@(x)p-x);

ExpectedValues (1)= p+(df*PZ_less_than_p+ExpectedZ_less_than_p)/(1-PZ_less_than_p);

ExpectedValues(2)= Probability _failure_less_than_p /(1- Probability _failure_less_than_p);

ExpectedValues (3)= 0;

end

S4. MATLAB code for expected makespan of more than one job

% The input parameters, jobs processing times, defect arrival and delay time parameters, downtime parameters are exported from the excel file % The outputs which are the expected makespan, optimal job sequence and inspection policy is exported to the excel files

Data = xlsread ('C:\data\Jobs processing times.xls');

FunctionExpectedValues=MorethanOneJob(t0,a,b,ExpectedValuesMatrix1,ExpectedValuesMatrix2,JobsList,PMScheme,beta1,eta1,beta2,eta2,df,dp,dm,InspectionTime) % Expected value for more than one job in a sequence

NumberofJobs=length(JobsList(:,1));

ExpectedValues(1)=0;

ExpectedValues(2)=0;

ExpectedValues(3)=0;

for i=1:NumberofJobs

if i==1

[F=@(x)(beta1/eta1).*((x+t0)/eta1).^(beta1-1).*exp(-1.*(((x+t0)/eta1).^beta1-(t0/eta1).^beta1)).*(1-exp(-1.*(((JobsList(i,2)+t0)/eta2).^beta2-((x+t0)/eta2).^beta2)))](mailto:F=@(x)(beta1/eta1).*((x+t0)/eta1).%5e(beta1-1).*exp(-1.*(((x+t0)/eta1).%5ebeta1-(t0/eta1).%5ebeta1)).*(1-exp(-1.*(((JobsList(i,2)+t0)/eta2).%5ebeta2-((x+t0)/eta2).%5ebeta2))));

PZ_less_than_p = integral(F,0,JobsList(i,2));

F = @(x,y)(x+y).*(beta1/eta1).*((x+t0)/eta1).^(beta1-1).*exp(-1.*(((x+t0)/eta1).^beta1-(t0/eta1).^beta1)).*(beta2/eta2).*((x+y+t0)./eta2).^(beta2-1).*exp(-1*(((y+x+t0)./eta2).^beta2-((x+t0)/eta2).^beta2));

ExpectedZ_less_than_p = integral2(F,0,JobsList(i,2),0,@(x)JobsList(i,2)-x);

ExpectedValues(1)=df*PZ_less_than_p+ExpectedZ_less_than_p;

ExpectedValues(2)=PZ_less_than_p;

ExpectedValues(3)=0;

else

L2=sum(JobsList(1:i-1,2));

U2=sum(JobsList(1:i,2));

for j=1:i %Number of Jobs

if (i==j)

F = @(x,y)(beta1/eta1).*((x+t0)/eta1).^(beta1-1).*exp(-1.*(((x+t0)/eta1).^beta1-(t0/eta1).^beta1)).*(beta2/eta2).*((x+y+t0)./eta2).^(beta2-1).*exp(-1*(((y+x+t0)./eta2).^beta2-((x+t0)/eta2).^beta2)); % probability of failure and defect arrival time

if j==1

L1=0;

U1=JobsList(1,2);

else

L1=sum(JobsList(1:j-1,2));

U1=sum(JobsList(1:j,2));

end;

int2 =integral2(F,L1,U1,0,@(x)U2-x);

F4 = @(x,y)(x+y-sum(JobsList(1:i-1,2))).*(beta1/eta1).*((x+t0)/eta1).^(beta1-1).*exp(-1.*(((x+t0)/eta1).^beta1-(t0/eta1).^beta1)).*(beta2/eta2).*((x+y+t0)./eta2).^(beta2-1).*exp(-1*(((y+x+t0)./eta2).^beta2-((x+t0)/eta2).^beta2)); % probability of failure and defect arrival time

ExpectedTime=integral2(F4,L1,U1,0,@(x)U2-x);

ExpectedValues(1)=ExpectedValues(1)+(df+ExpectedValuesMatrix1(1,i)+sum(JobsList(1:i-1,2)))*int2+ExpectedTime;

ExpectedValues(2)=ExpectedValues(2)+(1+ExpectedValuesMatrix1(2,i))*int2;

ExpectedValues(3)=ExpectedValues(3)+ExpectedValuesMatrix1(3,i)*int2;

else

k=j+1;

stillcheck=1;

while k <= i && stillcheck==1

if (i ~= j) && IndicatorLastoneOthersZero(PMScheme(j+1:k))==1

F = @(x,y)(beta1/eta1).*((x+t0)/eta1).^(beta1-1).*exp(-1.*(((x+t0)/eta1).^beta1-(t0/eta1).^beta1)).*(beta2/eta2).*((x+y+t0)./eta2).^(beta2-1).*exp(-1*(((y+x+t0)./eta2).^beta2-((x+t0)/eta2).^beta2)); % probability of failure and defect arrival time

if j==1

L1=0;

U1=JobsList(1,2);

else

L1=sum(JobsList(1:j-1,2));

U1=sum(JobsList(1:j,2));

end;

int2 =integral2(F,L1,U1,@(x)L2-x,@(x)U2-x);

Prob=MinimalRepairProb(a,b,U1);

ExpectedValues(1)=ExpectedValues(1)+(Prob*(dm+ExpectedValuesMatrix2(1,k))+(1-Prob)*(dp+ExpectedValuesMatrix1(1,k))+sum(JobsList(1:k-1,2)))*int2;

% ExpectedValues(2)=ExpectedValues(2)+ExpectedValuesMatrix2(2,k)*int2;

% ExpectedValues(3)=ExpectedValues(3)+(1+ExpectedValuesMatrix2(3,k))*int2;

ExpectedValues(2)=ExpectedValues(2)+(Prob*ExpectedValuesMatrix2(2,k)+(1-Prob)*ExpectedValuesMatrix1(2,k))*int2;

ExpectedValues(3)=ExpectedValues(3)+(1+Prob*ExpectedValuesMatrix2(3,k)+(1-Prob)*ExpectedValuesMatrix1(3,k))*int2;

stillcheck=0;

end;

k=k+1;

end;

if IndicatorAllZeros(PMScheme(j+1:i))==1

F = @(x,y)(beta1/eta1).*((x+t0)/eta1).^(beta1-1).*exp(-1.*(((x+t0)/eta1).^beta1-(t0/eta1).^beta1)).*(beta2/eta2).*((x+y+t0)./eta2).^(beta2-1).*exp(-1*(((y+x+t0)./eta2).^beta2-((x+t0)/eta2).^beta2)); % probability of failure and defect arrival time

if j==1

L1=0;

U1=JobsList(1,2);

else

L1=sum(JobsList(1:j-1,2));

U1=sum(JobsList(1:j,2));

end;

int2 =integral2(F,L1,U1,@(x)L2-x,@(x)U2-x);

F4 = @(x,y)(x+y-sum(JobsList(1:i-1,2))).*(beta1/eta1).*((x+t0)/eta1).^(beta1-1).*exp(-1.*(((x+t0)/eta1).^beta1-(t0/eta1).^beta1)).*(beta2/eta2).*((x+y+t0)./eta2).^(beta2-1).*exp(-1*(((y+x+t0)./eta2).^beta2-((x+t0)/eta2).^beta2));

ExpectedTime=integral2(F4,L1,U1,@(x)L2-x,@(x)U2-x);

ExpectedValues(1)=ExpectedValues(1)+(df+ExpectedValuesMatrix1(1,i)+sum(JobsList(1:i-1,2)))*int2+ExpectedTime;

ExpectedValues(2)=ExpectedValues(2)+(1+ExpectedValuesMatrix1(2,i))*int2;

ExpectedValues(3)=ExpectedValues(3)+ExpectedValuesMatrix1(3,i)*int2;

end;

end;

end;

end;

end;

L2=sum(JobsList(1:i,2));

U2=+inf;

for j=1:NumberofJobs+1

if (j>=NumberofJobs)

F = @(x,y)(beta1/eta1).*((x+t0)/eta1).^(beta1-1).*exp(-1.*(((x+t0)/eta1).^beta1-(t0/eta1).^beta1)).*(beta2/eta2).*((x+y+t0)./eta2).^(beta2-1).*exp(-1*(((y+x+t0)./eta2).^beta2-((x+t0)/eta2).^beta2));

if (j==NumberofJobs+1)

L1=sum(JobsList(1:NumberofJobs,2));

U1=+inf;

else

L1=sum(JobsList(1:j-1,2));

U1=sum(JobsList(1:j,2));

end;

if U1 ~= inf

int2 =integral2(F,L1,U1,@(x)L2-x,U2);

else

int2 =integral2(F,L1,U1,0,U2);

end;

ExpectedValues(1)=ExpectedValues(1)+(sum(JobsList(1:NumberofJobs,2)))*int2;

else

k=j+1;

stillcheck=1;

while k <= NumberofJobs && stillcheck==1

if (j~=NumberofJobs+1) && (j<k) && IndicatorLastoneOthersZero(PMScheme(j+1:k))==1

F = @(x,y)(beta1/eta1).*((x+t0)/eta1).^(beta1-1).*exp(-1.*(((x+t0)/eta1).^beta1-(t0/eta1).^beta1)).*(beta2/eta2).*((x+y+t0)./eta2).^(beta2-1).*exp(-1*(((y+x+t0)./eta2).^beta2-((x+t0)/eta2).^beta2));

if j==1

L1=0;

U1=JobsList(1,2);

else

if j <= NumberofJobs

L1=sum(JobsList(1:j-1,2));

U1=sum(JobsList(1:j,2));

else

L1=sum(JobsList(1:j,2));

U1=+inf;

end;

end;

int2 =integral2(F,L1,U1,@(x)L2-x,U2);

Prob=MinimalRepairProb(a,b,U1); % probability of minimal repair

ExpectedValues(1)=ExpectedValues(1)+(Prob*(dm+ExpectedValuesMatrix2(1,k))+(1-Prob)*(dp+ExpectedValuesMatrix1(1,k))+sum(JobsList(1:k-1,2)))*int2;

% ExpectedValues(2)=ExpectedValues(2)+ExpectedValuesMatrix2(2,k)*int2;

% ExpectedValues(3)=ExpectedValues(3)+(1+ExpectedValuesMatrix2(3,k))*int2;

ExpectedValues(2)=ExpectedValues(2)+(Prob*ExpectedValuesMatrix2(2,k)+(1-Prob)*ExpectedValuesMatrix1(2,k))*int2;

ExpectedValues(3)=ExpectedValues(3)+(1+Prob*ExpectedValuesMatrix2(3,k)+(1-Prob)*ExpectedValuesMatrix1(3,k))*int2;

stillcheck=0;

end;

k=k+1;

end;

if (j>=NumberofJobs) || IndicatorAllZeros(PMScheme(j+1:NumberofJobs))==1

F = @(x,y)(beta1/eta1).*((x+t0)/eta1).^(beta1-1).*exp(-1.*(((x+t0)/eta1).^beta1-(t0/eta1).^beta1)).*(beta2/eta2).*((x+y+t0)./eta2).^(beta2-1).*exp(-1*(((y+x+t0)./eta2).^beta2-((x+t0)/eta2).^beta2));

L1=sum(JobsList(1:j-1,2));

U1=sum(JobsList(1:j,2));

if U1 ~= inf

int2 =integral2(F,L1,U1,@(x)L2-x,U2);

else

int2 =integral2(F,L1,U1,0,U2);

end;

ExpectedValues(1)=ExpectedValues(1)+(sum(JobsList(1:NumberofJobs,2)))*int2;

end;

end;

end;

ExpectedValues(1)=ExpectedValues(1)/(1-PZ_less_than_p);

ExpectedValues(2)=ExpectedValues(2)/(1-PZ_less_than_p);

ExpectedValues(3)=ExpectedValues(3)/(1-PZ_less_than_p);

end

function MinimalProb=MinimalRepairProb(a,b,age) % function of probability of either minimal repair or replacement

MinimalProb=a*exp(-(b*age));

end
